# Supplementary material for: MicroRNA-451a prevents cutaneous squamous cell carcinoma progression via the 3-phosphoinositide-dependent protein kinase-1-mediated PI3K/AKT signaling pathway
Source: PubMed Central journal article supplement — Exp Ther Med. 2020 Dec 3;21(2):116. doi: 10.3892/etm.2020.9548 (PMC7739855; doi:10.3892/etm.2020.9548), 2020-12-03

Figure S1. KEGG signaling pathway enrichment analysis revealed that PDK1 is upstream of the PI3K/AKT signaling pathway. Differentially expressed genes are indicated by red stars. KEGG, Kyoto Encyclopedia of Genes and Genomes; PDK1, 3-phosphoinositide-dependent protein kinase 1.

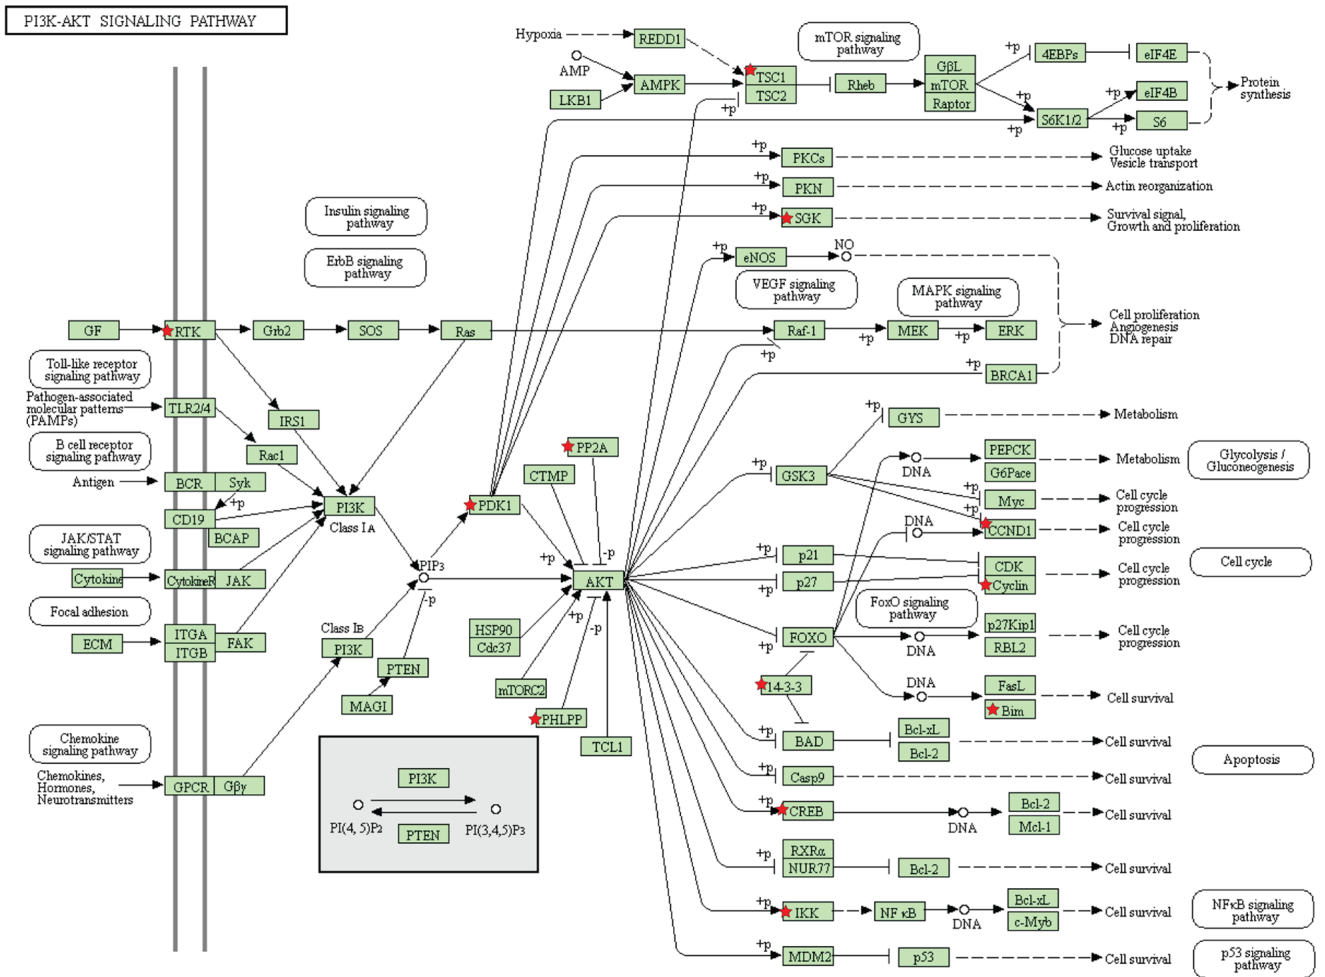

Supplement: Supplementary_Data.pdf [file Supplementary_Data.pdf]
